# Supplementary material
Source: bioRxiv or medRxiv preprint supplement (https://medrxiv.org/highwire/filestream/93903/field_highwire_adjunct_files/0/2020.08.19.20177956-1.pdf)
Supplement: Supplementary file [file 2020.08.19.20177956-1.pdf]

**Disparities in COVID-19 Hospitalizations and Mortality among Black and Hispanic Patients: Cross-Sectional Analysis from the Greater Houston Metropolitan Area**

Alan P. Pan MS,<sup>1</sup> Osman Khan BS,<sup>1</sup> Jennifer R. Meeks MS,<sup>1</sup>

Marc L. Boom MD,<sup>2,3</sup> Faisal N. Masud MD,<sup>3,4</sup> Julia D. Andrieni MD,<sup>2,3</sup>

Robert A. Phillips MD PhD,<sup>1,3,5</sup> Yordanos M. Tiruneh MPhil PhD,<sup>6</sup>

Bitu A. Kash PhD MBA,<sup>1,3,7</sup> Farhaan S. Vahidy PhD MBBS MPH<sup>1,8</sup>

1. *Center for Outcomes Research, Houston Methodist, Houston TX*
2. *Department of Clinical Medicine, Houston Methodist, Houston TX*
3. *Weill Cornell Medical College, New York NY*
4. *Department of Anesthesiology and Critical Care, Houston Methodist, Houston TX*
5. *Department of Cardiology, Houston Methodist, Houston TX*
6. *University of Texas Health Science Center at Tyler, TX*
7. *Texas A&M University School of Public Health, College Station, TX*
8. *Houston Methodist Neurological institute, Houston Methodist, Houston, TX*

**Corresponding Author**

Farhaan S. Vahidy, PhD MBBS MPH

Josie Roberts Building, Suite 4.123

Houston Methodist

7550 Greenbriar Drive

Houston, TX 77030

Phone: 346.356.1479

[fvahidy@houstonmethodist.org](mailto:fvahidy@houstonmethodist.org)

**Appendix Table 1.** Socio-Demographic, Comorbidity, and Clinical Factors Associated with In-Hospital Mortality Among hospitalized COVID-19 patients

**Appendix Table 2.** Baseline Socio-Demographic and Comorbidity Factors associated with hospitalization among SARS-CoV-2 Positive Individuals

**Appendix Table 3.** Differences in COVID-19 Case Demographics for Select U.S. Metropolitan Areas

**Appendix Table 1:** Socio-Demographic, Comorbidity, and Clinical Factors Associated with In-Hospital Mortality Among hospitalized COVID-19 patients

|                                                          | <b>Mortality</b><br>(n = 234) | <b>No Mortality</b><br>(n = 3,302) | <b>OR (95% CI)*</b>   |
|----------------------------------------------------------|-------------------------------|------------------------------------|-----------------------|
| <b>Demographic and Social Characteristics – n (%)</b>    |                               |                                    |                       |
| Age – mean (SD)                                          | 73.4 (13.4)                   | 58.0 (17.1)                        | 1.06 (1.05, 1.07)     |
| Female (vs. Male)                                        | 103 (44.0)                    | 1592 (48.2)                        | 0.84 (0.65, 1.10)     |
| Race                                                     |                               |                                    |                       |
| White                                                    | 143 (61.1)                    | 2,007 (60.8)                       | <i>Reference</i>      |
| Black                                                    | 58 (24.8)                     | 889 (26.9)                         | 0.92 (0.66, 1.25)     |
| Asian                                                    | 18 (7.7)                      | 128 (3.9)                          | 1.97 (1.14, 3.25)     |
| Other / Mixed / Not Reported                             | 15 (6.4)                      | 278 (8.4)                          | 0.76 (0.42, 1.27)     |
| Hispanic (vs. non-Hispanic)                              | 66 (28.2)                     | 1,300 (39.4)                       | 0.60 (0.45, 0.81)     |
| Insurance Type                                           |                               |                                    |                       |
| Commercial                                               | 25 (10.7)                     | 1,159 (35.1)                       | <i>Reference</i>      |
| Medicare                                                 | 103 (44.0)                    | 1,244 (37.7)                       | 3.84 (2.50, 6.11)     |
| Medicaid                                                 | 1 (0.4)                       | 207 (6.3)                          | 0.22 (0.01, 1.07)     |
| Self-Pay                                                 | 10 (4.3)                      | 623 (18.9)                         | 0.74 (0.34, 1.51)     |
| Other                                                    | 95 (40.6)                     | 69 (2.1)                           | 63.83 (39.18, 107.48) |
| Residence: Low Income Zip Code <sup>†</sup>              | 120 (51.3)                    | 1,824 (55.2)                       | 0.84 (0.64, 1.10)     |
| Residence: High Pop Density Zip Code <sup>‡</sup>        | 98 (41.9)                     | 1,501 (45.5)                       | 0.86 (0.65, 1.12)     |
| <b>Comorbidities and Pre-existing Conditions – n (%)</b> |                               |                                    |                       |
| Charlson Comorbidity Index Score                         | 7 (5 – 9)                     | 3 (1 – 6)                          | 1.21 (1.18, 1.25)     |
| BMI – mean (SD)                                          | 29.6 (7.5)                    | 31.5 (8.2)                         | 0.97 (0.95, 0.99)     |
| Obesity                                                  | 83 (35.5)                     | 1,031 (31.2)                       | 1.21 (0.91, 1.59)     |
| Hypertension                                             | 205 (87.6)                    | 2,136 (64.7)                       | 3.86 (2.64, 5.84)     |
| Smoking (Current/Former)                                 | 82 (35.0)                     | 862 (24.0)                         | 1.84 (1.38, 2.45)     |
| <b>Vital Signs at Hospital Admission – n (%)</b>         |                               |                                    |                       |
| SBP (mmHg) – mean (SD)                                   | 133.5 (22.5)                  | 133.3 (19.3)                       | 1.00 (0.99, 1.01)     |
| DBP (mmHg) – mean (SD)                                   | 69.1 (10.3)                   | 72.7 (9.6)                         | 0.96 (0.95, 0.97)     |
| Respiratory Rate ≥ 24 breath / min                       | 76 (32.5)                     | 665 (20.1)                         | 1.91 (1.43, 2.53)     |
| Temperature ≥ 38°C                                       | 10 (4.3)                      | 217 (6.6)                          | 0.52 (0.23, 0.99)     |
| Oxygen Saturation < 94%                                  | 69 (29.5)                     | 545 (16.5)                         | 2.14 (1.58, 2.86)     |
| <b>Hospital Complications – n (%)</b>                    |                               |                                    |                       |
| Pneumonia                                                | 192 (82.1)                    | 2168 (65.7)                        | 2.39 (1.72, 3.41)     |
| ARDS                                                     | 66 (28.2)                     | 123 (3.7)                          | 10.15 (7.23, 14.19)   |
| Bronchitis                                               | 6 (2.6)                       | 38 (1.2)                           | 2.26 (0.85, 5.02)     |
| Lower Respiratory Tract Infection                        | 0 (0.0)                       | 33 (1.0)                           | -                     |
| Acute Renal Injury                                       | 153 (65.4)                    | 625 (18.9)                         | 8.09 (6.11, 10.78)    |
| Acute Hepatic Injury                                     | 23 (9.8)                      | 23 (0.7)                           | 15.54 (8.55, 28.27)   |
| Cardiomyopathy or CHF                                    | 82 (35.0)                     | 340 (10.3)                         | 4.70 (3.50, 6.27)     |
| Hypoxic Respiratory Failure                              | 133 (56.8)                    | 1250 (37.9)                        | 2.16 (1.66, 2.83)     |
| <b>Therapeutics – n (%)</b>                              |                               |                                    |                       |
| Hydroxychloroquine                                       | 58 (24.8)                     | 305 (9.2)                          | 3.24 (2.34, 4.43)     |
| Ribavirin                                                | 35 (15.0)                     | 69 (2.0)                           | 8.24 (5.31, 12.60)    |
| Azithromycin                                             | 21 (9.0)                      | 508 (15.4)                         | 0.54 (0.33, 0.84)     |
| Lopinavir/Ritonavir                                      | 9 (3.8)                       | 15 (0.5)                           | 8.77 (3.65, 19.92)    |
| Remdesivir                                               | 25 (10.7)                     | 666 (20.2)                         | 0.47 (0.30, 0.71)     |
| Tocilizumab                                              | 75 (32.1)                     | 608 (18.4)                         | 2.09 (1.56, 2.78)     |

|                                                                                                                                                                    | <b>Mortality</b><br>(n = 234) | <b>No Mortality</b><br>(n = 3,302) | <b>OR (95% CI)*</b>  |
|--------------------------------------------------------------------------------------------------------------------------------------------------------------------|-------------------------------|------------------------------------|----------------------|
| Antithrombotic                                                                                                                                                     | 115 (49.1)                    | 1,058 (32.0)                       | 2.05 (1.57, 2.68)    |
| Anticoagulants                                                                                                                                                     | 209 (89.3)                    | 2,981 (90.3)                       | 0.90 (0.60, 1.42)    |
| Dexamethasone                                                                                                                                                      | 79 (33.8)                     | 1,473 (44.6)                       | 0.63 (0.48, 0.83)    |
| <b>Laboratory Parameters – n (%)<sup>§</sup></b>                                                                                                                   |                               |                                    |                      |
| WBC count <4000/μl                                                                                                                                                 | 5/234 (2.1)                   | 230/3293 (7.0)                     | 0.29 (0.10, 0.64)    |
| Lymphocytes < 20%                                                                                                                                                  | 214/234 (91.5)                | 2147/3291 (65.2)                   | 5.70 (3.68, 9.35)    |
| Platelet count <150,000/μl                                                                                                                                         | 65/234 (27.8)                 | 370/3293 (11.2)                    | 3.04 (2.23, 4.11)    |
| B-natriuretic peptide >100 pg/ml,                                                                                                                                  | 144/220 (65.5)                | 680/2275 (29.9)                    | 4.44 (3.33, 5.98)    |
| Procalcitonin >0.25 ng/ml                                                                                                                                          | 109/135 (80.7)                | 521/1137 (45.8)                    | 4.96 (3.23, 7.87)    |
| Troponin ≥ 0.06 ng/ml                                                                                                                                              | 164/221 (74.2)                | 500/1798 (27.8)                    | 1.03 (1.01, 1.05)    |
| Aspartate aminotransferase > 40 U/l                                                                                                                                | 174/232 (75.0)                | 1625/3227 (50.4)                   | 2.95 (2.19, 4.04)    |
| Alanine aminotransferase >40 U/l                                                                                                                                   | 107/232 (46.1)                | 1352/3221 (42.0)                   | 1.18 (0.90, 1.55)    |
| Total Bilirubin ≥ 1.2 mg/dl                                                                                                                                        | 26/223 (11.7)                 | 104/3009 (3.5)                     | 3.69 (2.30, 5.72)    |
| C-reactive protein >8.2 ng/ml                                                                                                                                      | 206/207 (99.5)                | 2663/2812 (94.7)                   | 11.53 (2.57, 203.25) |
| Ferritin level > 3000 ng/ml                                                                                                                                        | 33/206 (16.0)                 | 148/2845 (5.2)                     | 3.48 (2.28, 5.17)    |
| D-dimer > 0.5 ug/ml                                                                                                                                                | 197/198 (99.5)                | 2342/2779 (84.3)                   | 36.76 (8.25, 646.93) |
| Creatinine > 1.5 mg/dl                                                                                                                                             | 115/234 (49.1)                | 487/3264 (14.9)                    | 5.51 (4.19, 7.25)    |
| Venous lactate > 2.2 mmol/l                                                                                                                                        | 103/217 (47.5)                | 397/2351 (16.9)                    | 4.45 (3.33, 5.93)    |
| <b>Hospital Acuity of Care Factors – n (%)</b>                                                                                                                     |                               |                                    |                      |
| ICU admission                                                                                                                                                      | 190 (81.2)                    | 911 (27.6)                         | 11.33 (8.17, 16.05)  |
| Invasive Mechanical Ventilation                                                                                                                                    | 160 (68.4)                    | 421 (12.7)                         | 14.80 (11.07, 19.94) |
| * Unadjusted Odds Ratios and 95% Confidence Intervals for association between individual co-variables and in-hospital mortality among confirmed COVID-19 cases     |                               |                                    |                      |
| † Low income classified as zip codes in the 2 lowest percentiles for median house income                                                                           |                               |                                    |                      |
| ‡ High population density classified as zip codes in the 2 highest percentiles for population density                                                              |                               |                                    |                      |
| § Denominator denotes number of non-missing values                                                                                                                 |                               |                                    |                      |
| SBP: Systolic Blood Pressure, DBP: Diastolic Blood Pressure, ARDS: Acute Respiratory Distress Syndrome, CHF: Congestive Heart Failure, WBC: White Blood Cell Count |                               |                                    |                      |

**Appendix Table 2:** Baseline Socio-Demographic and Comorbidity Factors associated with hospitalization among SARS-CoV-2 Positive Individuals

|                                                                                                                                                                | <b>Hospitalized</b><br>(n = 3,536) | <b>Not Hospitalized</b><br>(n = 8,548) | <b>OR (95% CI)*</b> |
|----------------------------------------------------------------------------------------------------------------------------------------------------------------|------------------------------------|----------------------------------------|---------------------|
| <b>Demographic and Social Characteristics – n (%)</b>                                                                                                          |                                    |                                        |                     |
| Age – mean (SD)                                                                                                                                                | 59.0 (17.3)                        | 41.7 (16.7)                            | 1.06 (1.06, 1.06)   |
| Female (vs. Male)                                                                                                                                              | 1,695 (47.9)                       | 5033 (58.9)                            | 0.64 (0.59, 0.70)   |
| <b>Race</b>                                                                                                                                                    |                                    |                                        |                     |
| White                                                                                                                                                          | 2,150 (60.8)                       | 4918 (57.5)                            | <i>Reference</i>    |
| Black                                                                                                                                                          | 947 (26.8)                         | 2150 (25.2)                            | 1.01 (0.92, 1.10)   |
| Asian                                                                                                                                                          | 146 (4.1)                          | 464 (5.4)                              | 0.72 (0.59, 0.87)   |
| Other / Mixed / Not Reported                                                                                                                                   | 293 (8.3)                          | 1016 (11.9)                            | 0.66 (0.57, 0.76)   |
| Hispanic (vs. Non-Hispanic)                                                                                                                                    | 1,366 (38.6)                       | 3006 (35.2)                            | 1.12 (1.04, 1.22)   |
| <b>Insurance Type</b>                                                                                                                                          |                                    |                                        |                     |
| Commercial                                                                                                                                                     | 1,184 (33.5)                       | 4615 (54.0)                            | <i>Reference</i>    |
| Medicare                                                                                                                                                       | 1,347 (38.1)                       | 864 (10.1)                             | 6.08 (5.46, 6.76)   |
| Medicaid                                                                                                                                                       | 208 (5.9)                          | 534 (6.2)                              | 1.52 (1.28, 1.80)   |
| Self-Pay                                                                                                                                                       | 633 (17.9)                         | 2433 (28.5)                            | 1.01 (0.91, 1.13)   |
| Other                                                                                                                                                          | 164 (4.6)                          | 102 (1.2)                              | 6.27 (4.86, 8.11)   |
| Residence: Low Income Zip Code <sup>†</sup>                                                                                                                    | 1,944 (55.0)                       | 3940 (46.1)                            | 1.44 (1.33, 1.56)   |
| Residence: Population Dense Zip <sup>‡</sup>                                                                                                                   | 1,599 (45.2)                       | 3776 (44.2)                            | 1.05 (0.97, 1.14)   |
| <b>Comorbidity</b>                                                                                                                                             |                                    |                                        |                     |
| Charlson Comorbidity Index Score                                                                                                                               | 3 (1 – 6)                          | 0 (0 – 2)                              | 1.40 (1.37, 1.42)   |
| BMI                                                                                                                                                            | 31.4 (8.1)                         | 30.8 (7.3)                             | 1.01 (1.00, 1.01)   |
| Obesity                                                                                                                                                        | 1,114 (31.5)                       | 1326 (15.5)                            | 2.50 (2.28, 2.74)   |
| Hypertension                                                                                                                                                   | 2,341 (66.2)                       | 2280 (26.7)                            | 5.38 (4.95, 5.86)   |
| Smoking (Current/Former)                                                                                                                                       | 874 (24.7)                         | 1263 (14.8)                            | 1.49 (1.35, 1.65)   |
| * <i>Unadjusted Odds Ratios and 95% Confidence Intervals for association between individual co-variates and hospitalization among confirmed COVID-19 cases</i> |                                    |                                        |                     |
| <sup>†</sup> <i>Low income classified as zip codes in the 2 lowest percentiles for median house income</i>                                                     |                                    |                                        |                     |
| <sup>‡</sup> <i>High population density classified as zip codes in the 2 highest percentiles for population density</i>                                        |                                    |                                        |                     |

**Appendix Table 3. Differences in COVID-19 Publicly Reported Case Demographics for Select U.S. Metropolitan Areas**

|                                                                                                                                                                                                                                                                                                                                                                                                                                                                                                                                                                                                                                                                                                                                                                                                                                                                                                                                                                                                                                                 | Houston                            | New Orleans                      | New York City                             | Los Angeles                               | Chicago                            | United States                   |
|-------------------------------------------------------------------------------------------------------------------------------------------------------------------------------------------------------------------------------------------------------------------------------------------------------------------------------------------------------------------------------------------------------------------------------------------------------------------------------------------------------------------------------------------------------------------------------------------------------------------------------------------------------------------------------------------------------------------------------------------------------------------------------------------------------------------------------------------------------------------------------------------------------------------------------------------------------------------------------------------------------------------------------------------------|------------------------------------|----------------------------------|-------------------------------------------|-------------------------------------------|------------------------------------|---------------------------------|
| <b>Total Cases / Hospitalizations / Deaths*</b>                                                                                                                                                                                                                                                                                                                                                                                                                                                                                                                                                                                                                                                                                                                                                                                                                                                                                                                                                                                                 | 94,978 / - / 1,491<br>(~7/28/2020) | 10,071 / - / 553<br>(~7/28/2020) | 220,907 / 56,040 / 18,878<br>(~7/28/2020) | 178,642 / ~12,300 / 4,426<br>(~7/28/2020) | 59,388 / - / 2,759<br>(~7/27/2020) | 4.2M / - / 147K<br>(~7/28/2020) |
| <b>Infection</b>                                                                                                                                                                                                                                                                                                                                                                                                                                                                                                                                                                                                                                                                                                                                                                                                                                                                                                                                                                                                                                |                                    |                                  |                                           |                                           |                                    |                                 |
| Ratio (NHB% / NHW%)                                                                                                                                                                                                                                                                                                                                                                                                                                                                                                                                                                                                                                                                                                                                                                                                                                                                                                                                                                                                                             | 0.84<br>(22.0 / 26.1)              | 3.20<br>(60.2 / 18.8)            | 1.05<br>(29.9 / 28.5)                     | 0.37<br>(4.2 / 11.4)                      | 1.94<br>(29.9 / 15.4)              | -                               |
| Ratio (Hispanic% / NH%)                                                                                                                                                                                                                                                                                                                                                                                                                                                                                                                                                                                                                                                                                                                                                                                                                                                                                                                                                                                                                         | 0.85<br>(45.9 / 54.1)              | -                                | 0.52<br>(34.0 / 66.0)                     | 1.26<br>(55.7 / 44.3)                     | 0.88<br>(46.9 / 53.1)              | -                               |
| <b>Hospitalization</b>                                                                                                                                                                                                                                                                                                                                                                                                                                                                                                                                                                                                                                                                                                                                                                                                                                                                                                                                                                                                                          |                                    |                                  |                                           |                                           |                                    |                                 |
| Ratio (NHB% / NHW%)                                                                                                                                                                                                                                                                                                                                                                                                                                                                                                                                                                                                                                                                                                                                                                                                                                                                                                                                                                                                                             | -                                  | -                                | 1.33<br>(33.0 / 24.9)                     | -                                         | -                                  | -                               |
| Ratio (Hispanic% / NH%)                                                                                                                                                                                                                                                                                                                                                                                                                                                                                                                                                                                                                                                                                                                                                                                                                                                                                                                                                                                                                         | -                                  | -                                | 0.52<br>(34.4 / 65.6)                     | -                                         | -                                  | -                               |
| <b>Mortality</b>                                                                                                                                                                                                                                                                                                                                                                                                                                                                                                                                                                                                                                                                                                                                                                                                                                                                                                                                                                                                                                |                                    |                                  |                                           |                                           |                                    |                                 |
| Ratio (NHB% / NHW%)                                                                                                                                                                                                                                                                                                                                                                                                                                                                                                                                                                                                                                                                                                                                                                                                                                                                                                                                                                                                                             | -                                  | 3.25<br>(75.1 / 23.1)            | 1.09<br>(30.4 / 27.8)                     | 0.42<br>(10.6 / 25.2)                     | 2.24<br>(43.0 / 19.2)              | -                               |
| Ratio (Hispanic% / NH%)                                                                                                                                                                                                                                                                                                                                                                                                                                                                                                                                                                                                                                                                                                                                                                                                                                                                                                                                                                                                                         | -                                  | -                                | 0.51<br>(33.6 / 66.4)                     | 0.92<br>(47.8 / 52.2)                     | 0.49<br>(32.7 / 67.3)              | -                               |
| <b>Population Size and Demographics</b>                                                                                                                                                                                                                                                                                                                                                                                                                                                                                                                                                                                                                                                                                                                                                                                                                                                                                                                                                                                                         |                                    |                                  |                                           |                                           |                                    |                                 |
| Population, 2018 <sup>†</sup>                                                                                                                                                                                                                                                                                                                                                                                                                                                                                                                                                                                                                                                                                                                                                                                                                                                                                                                                                                                                                   | 2,325,502                          | 391,006                          | 8,398,748                                 | 3,990,456                                 | 2,705,994                          | 328,239,523                     |
| <b>Region Demographics<sup>†</sup></b>                                                                                                                                                                                                                                                                                                                                                                                                                                                                                                                                                                                                                                                                                                                                                                                                                                                                                                                                                                                                          |                                    |                                  |                                           |                                           |                                    |                                 |
| White only, not Hispanic/Latino                                                                                                                                                                                                                                                                                                                                                                                                                                                                                                                                                                                                                                                                                                                                                                                                                                                                                                                                                                                                                 | 24.6%                              | 30.6%                            | 32.1%                                     | 28.5%                                     | 32.8%                              | 60.4%                           |
| Black/AA only                                                                                                                                                                                                                                                                                                                                                                                                                                                                                                                                                                                                                                                                                                                                                                                                                                                                                                                                                                                                                                   | 22.5%                              | 59.7%                            | 24.3%                                     | 8.9%                                      | 30.1%                              | 13.4%                           |
| Black / White Ratio                                                                                                                                                                                                                                                                                                                                                                                                                                                                                                                                                                                                                                                                                                                                                                                                                                                                                                                                                                                                                             | 0.91                               | 1.95                             | 0.76                                      | 0.31                                      | 0.92                               | 0.22                            |
| Hispanic/Latino                                                                                                                                                                                                                                                                                                                                                                                                                                                                                                                                                                                                                                                                                                                                                                                                                                                                                                                                                                                                                                 | 44.8%                              | 5.5%                             | 29.1%                                     | 48.6%                                     | 29.0%                              | 18.3%                           |
| Hispanic / Non-Hispanic Ratio                                                                                                                                                                                                                                                                                                                                                                                                                                                                                                                                                                                                                                                                                                                                                                                                                                                                                                                                                                                                                   | 0.81                               | 0.06                             | 0.41                                      | 0.95                                      | 0.36                               | 0.22                            |
| <p>* Source:<br/> <a href="https://www.cdc.gov/coronavirus/2019-nCoV/index.html">https://www.cdc.gov/coronavirus/2019-nCoV/index.html</a><br/> <a href="https://www.tmc.edu/coronavirus-updates/">https://www.tmc.edu/coronavirus-updates/</a><br/> <a href="https://publichealth.harriscountytexas.gov/Resources/2019-Novels-Coronavirus">https://publichealth.harriscountytexas.gov/Resources/2019-Novels-Coronavirus</a><br/> <a href="https://ready.nola.gov/incident/coronavirus/">https://ready.nola.gov/incident/coronavirus/</a><br/> <a href="https://www1.nyc.gov/site/doh/covid/covid-19-data.page">https://www1.nyc.gov/site/doh/covid/covid-19-data.page</a><br/> <a href="http://publichealth.lacounty.gov/media/Coronavirus/">http://publichealth.lacounty.gov/media/Coronavirus/</a><br/> <a href="https://www.chicago.gov/city/en/sites/covid-19/home.html">https://www.chicago.gov/city/en/sites/covid-19/home.html</a><br/>                     Note: Public data are reported. Information not available is left blank.</p> |                                    |                                  |                                           |                                           |                                    |                                 |
| <p><sup>†</sup> American Community Survey, 2014-18</p>                                                                                                                                                                                                                                                                                                                                                                                                                                                                                                                                                                                                                                                                                                                                                                                                                                                                                                                                                                                          |                                    |                                  |                                           |                                           |                                    |                                 |
